# Supplementary material for: Optical fingerprints and electron transport properties of DNA bases adsorbed on monolayer MoS2
Source: Royal Society of Chemistry journal article supplement (doi:10.1039/c6ra10008b), 2016-01-01
Supplement: c6ra10008b1.pdf [file c6ra10008b1.pdf]

## Supplementary Information

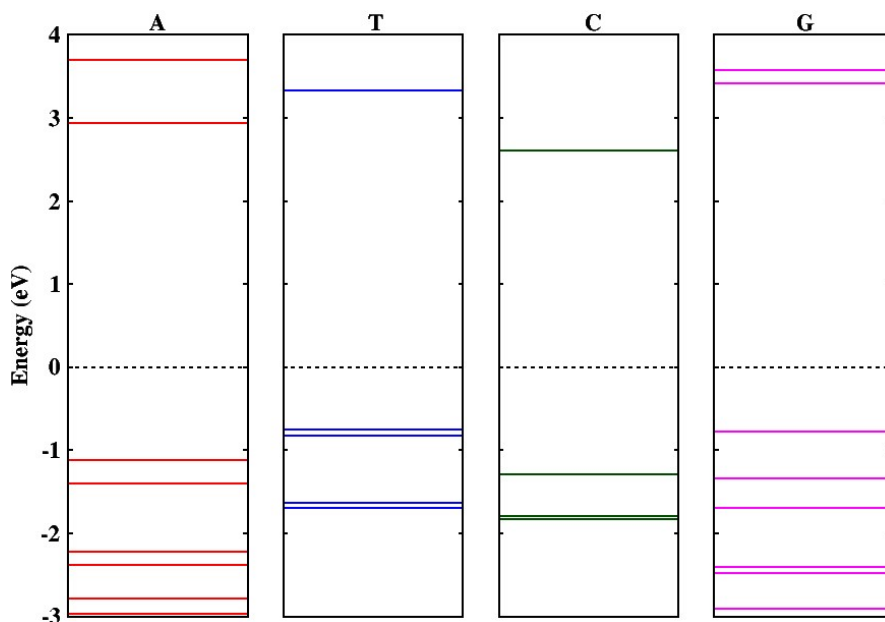

**Figure S1:** Molecular energy levels for isolated nucleobase (A, T, C and G) of DNA. Fermi level is set at 0 eV.

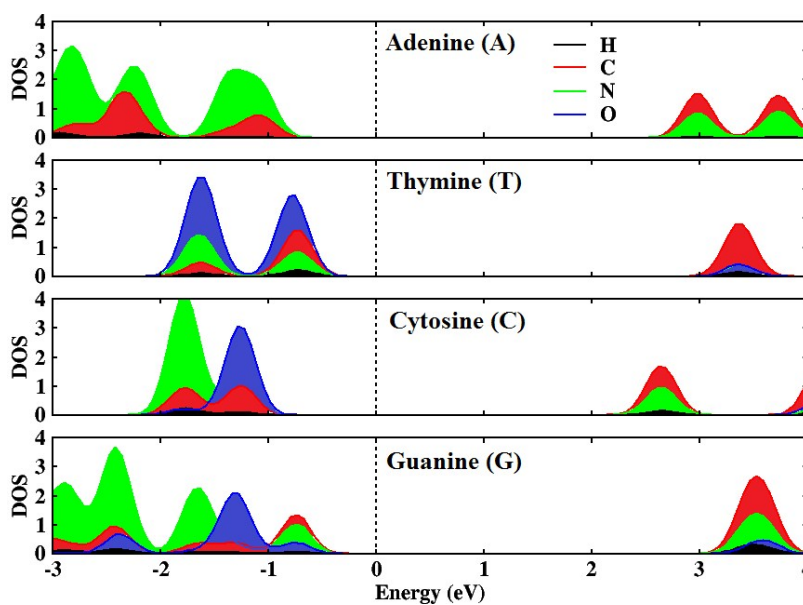

**Figure S2:** Molecular electron density of states (DOS) for isolated nucleobase (A, T, C and G) of DNA. Fermi level is set at 0 eV.

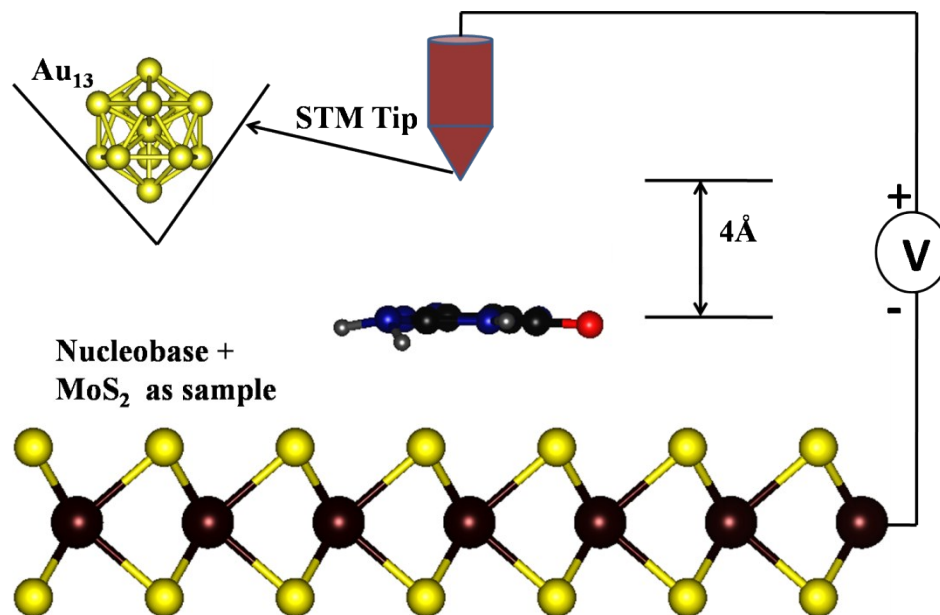

**Figure S3.** A schematic of the STM like setup for Guanine + MoS<sub>2</sub>.

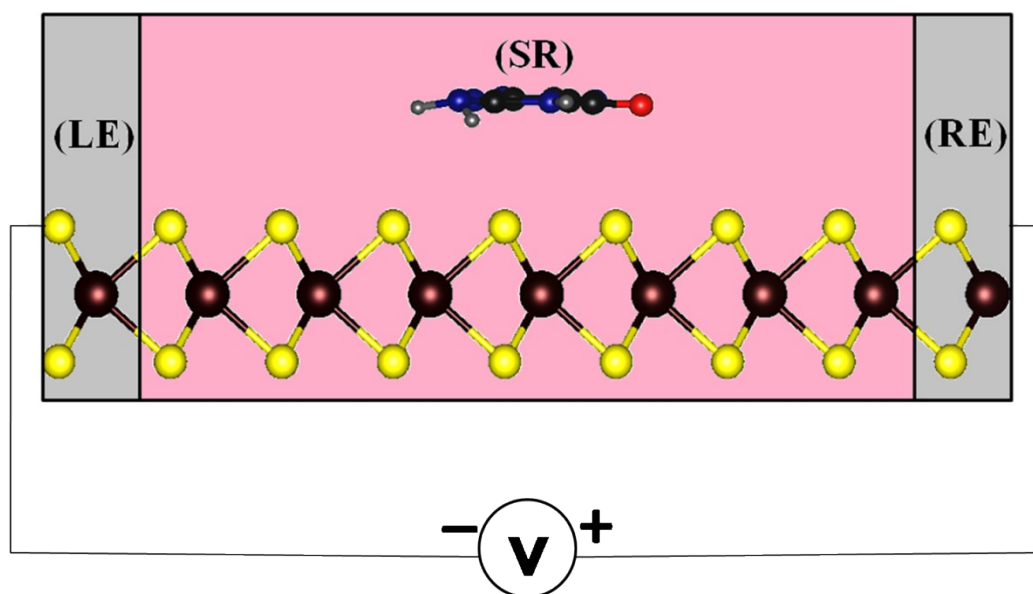

**Figure S4.** A two terminal configuration of the transport model for G + MoS<sub>2</sub> conjugate system.

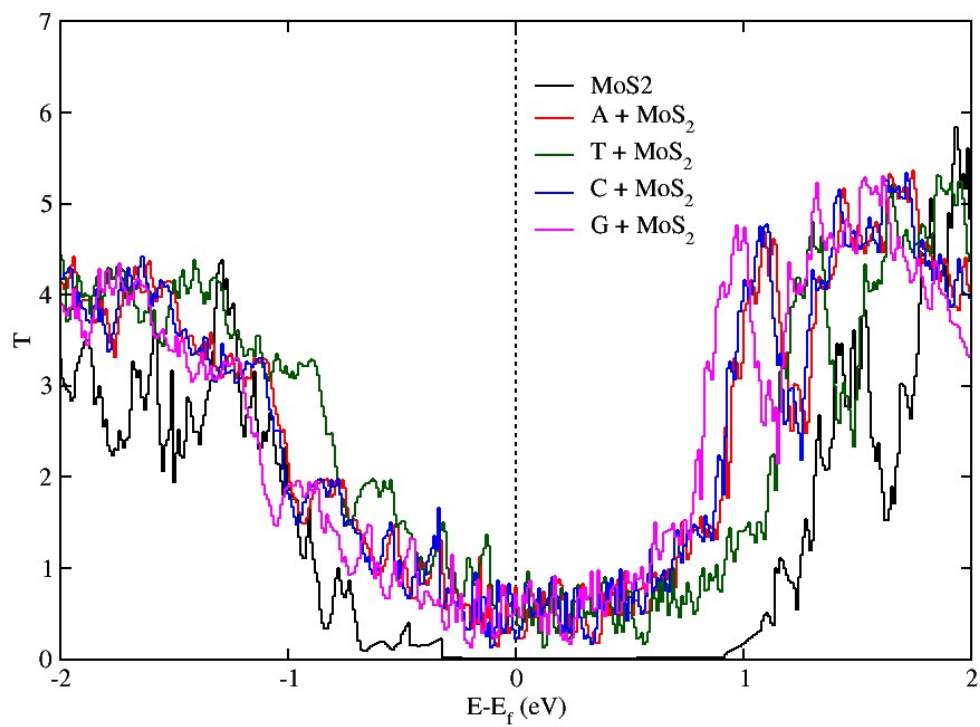

**Figure S5.** Transmission coefficients as a function of energy for pristine and nucleobase adsorbed MoS<sub>2</sub>.
